# Supplementary material for: Porous hydrogen substituted graphyne as a promising anode for lithium-ion batteries
Source: Royal Society of Chemistry journal article supplement (doi:10.1039/d1ra03396d), 2021-01-01
Supplement: d1ra03396d1.pdf [file d1ra03396d1.pdf]

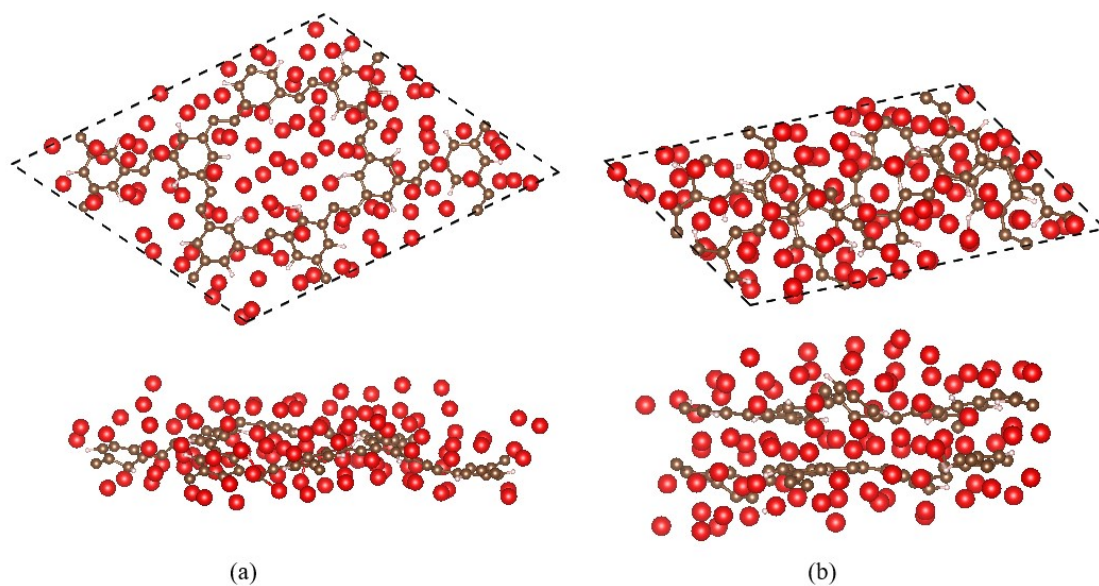

Fig. S1: Top and side views of the snapshots from ab initio molecular dynamics simulation at 300K for (a) 28 Li adsorption on monolayer HsGY and (b) 48 Li adsorption on bilayer HsGY.
